# Supplementary material
Source: PubMed Central journal article supplement (PMC8451443)
Supplement: jcm.00845-21-s0002.pdf [file jcm.00845-21-s0002.pdf]

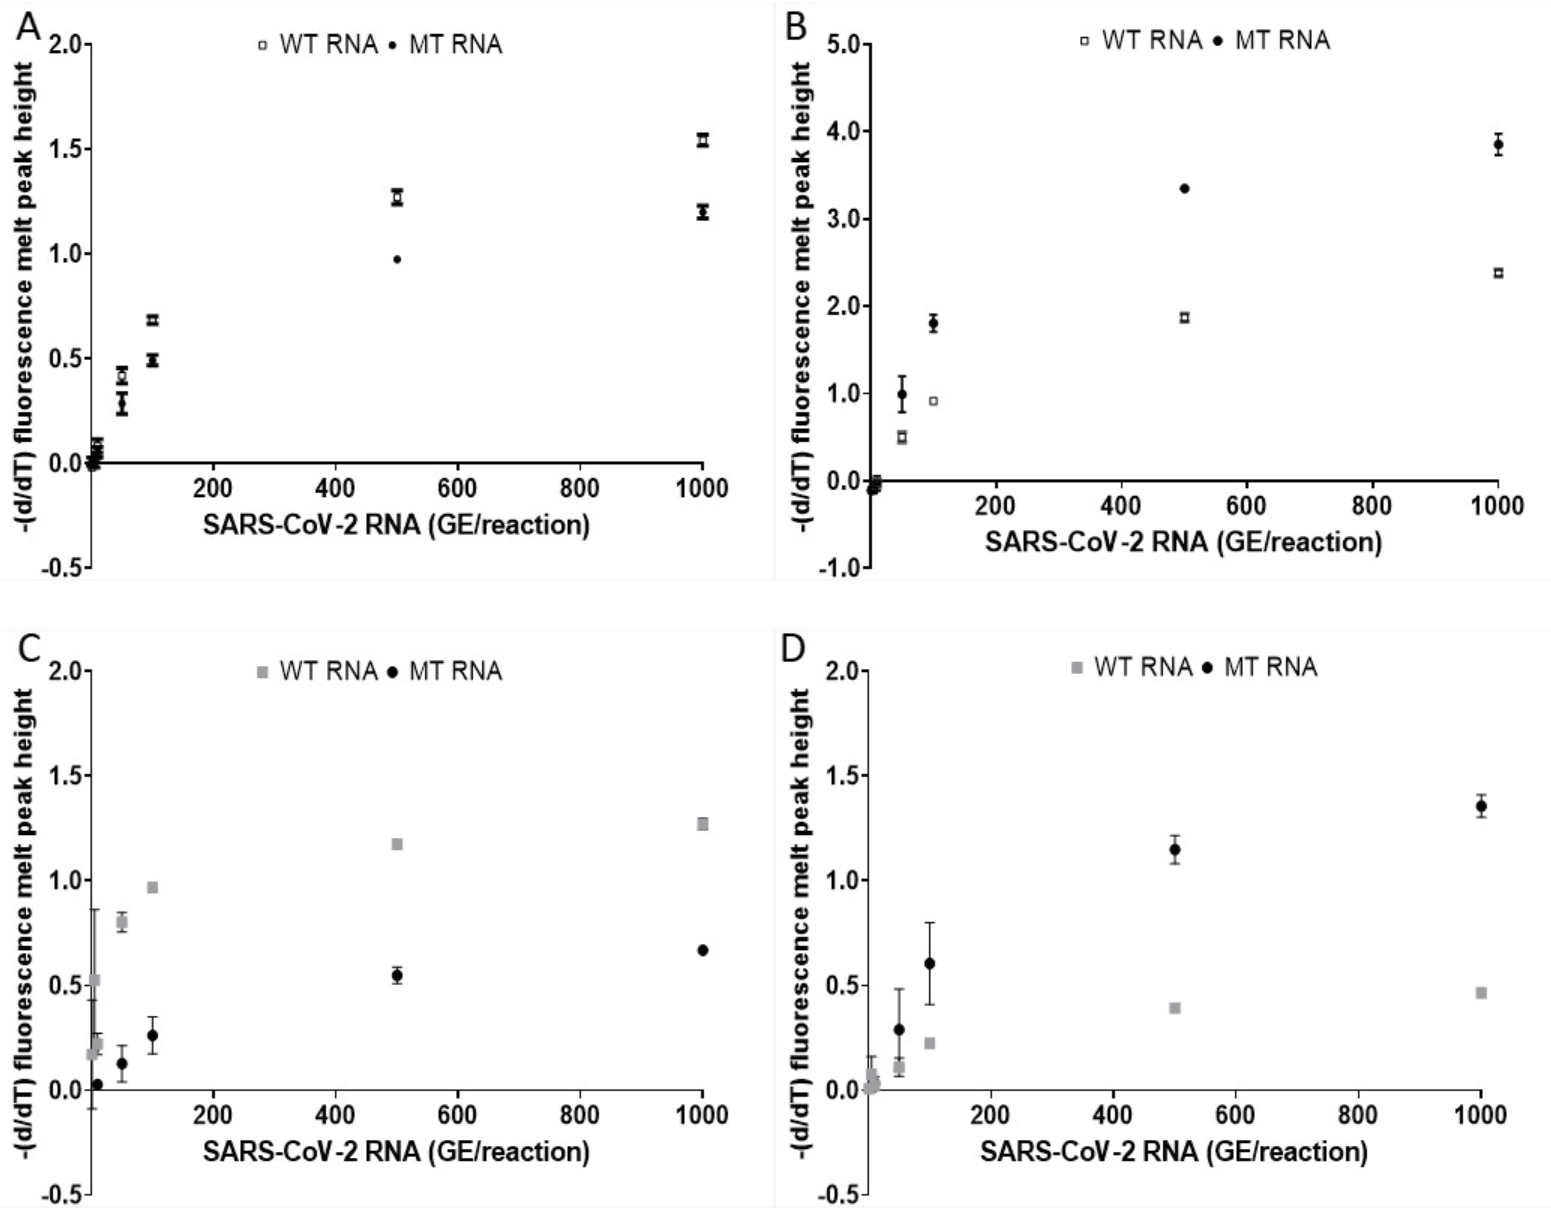

Supplementary Fig. S1. The effect of target concentration on the melt peak height generated by the SMB-501 (A and B) and SMB-484 (C and D) assays tested against SARS-CoV-2 RNA. A and C- SARS-CoV-2 wildtype (WT) RNA; B- B.1.1.7 mutant (MT) RNA and D- B.351 mutant (MT) RNA at the indicated number of genomic equivalents (GEs).
